# Supplementary material for: Biosemantics guided gene expression profiling of Sjögren’s syndrome: a comparative analysis with systemic lupus erythematosus and rheumatoid arthritis
Source: Springer Nature journal article supplement (doi:10.1186/s13075-017-1400-3), 2017-08-17

**S1**

## Analysis 1

(Fig. 1)

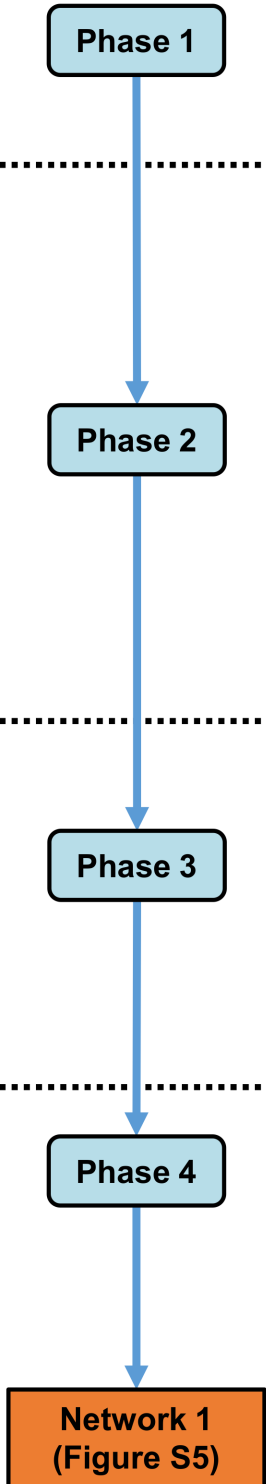

## Analysis 2

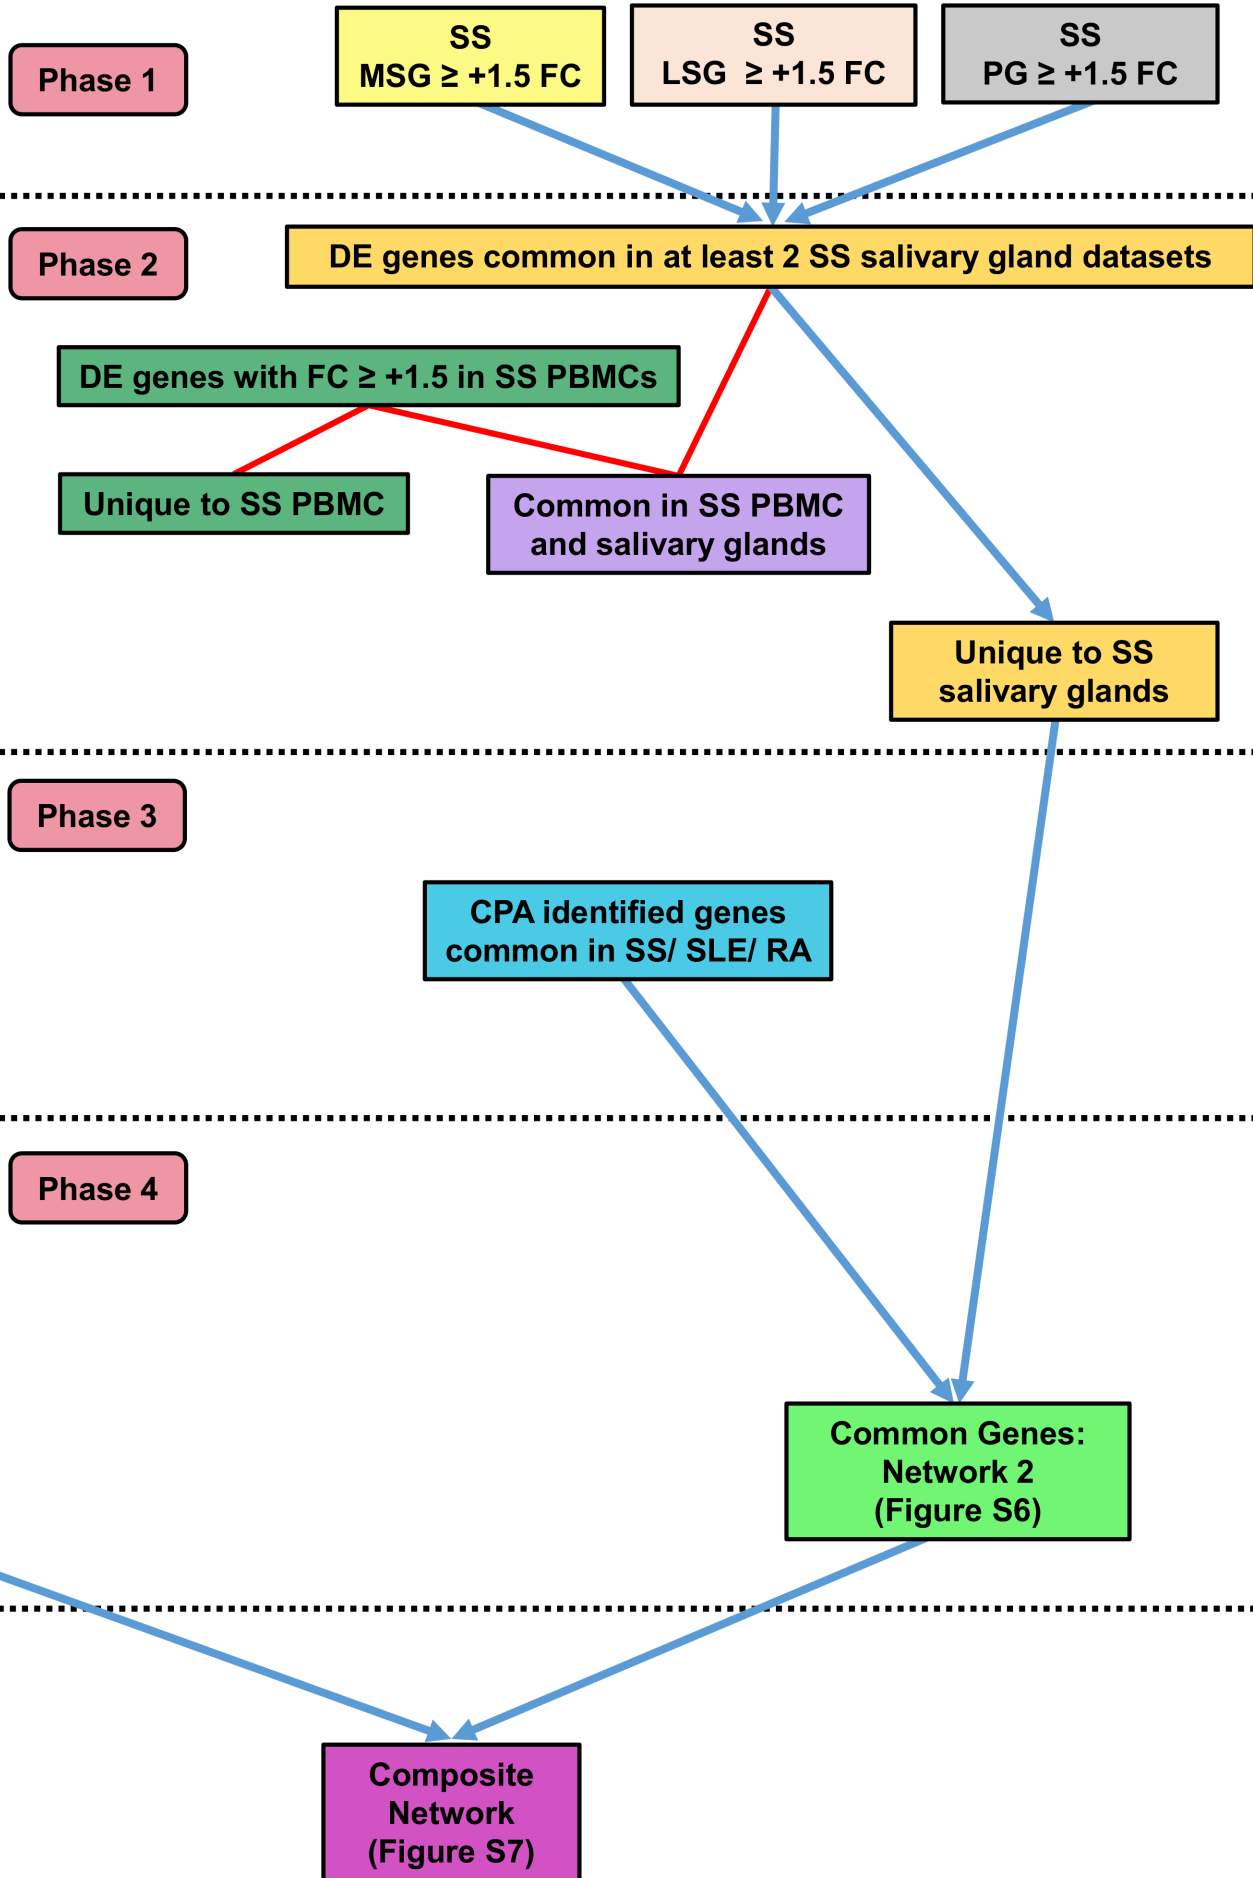

Supplement: MOESM2 [file 14222708]
