# Supplementary material for: Biosemantics guided gene expression profiling of Sjögren’s syndrome: a comparative analysis with systemic lupus erythematosus and rheumatoid arthritis
Source: Springer Nature journal article supplement (doi:10.1186/s13075-017-1400-3), 2017-08-17
Supplement: MOESM7 [file 14222708]

**S2**

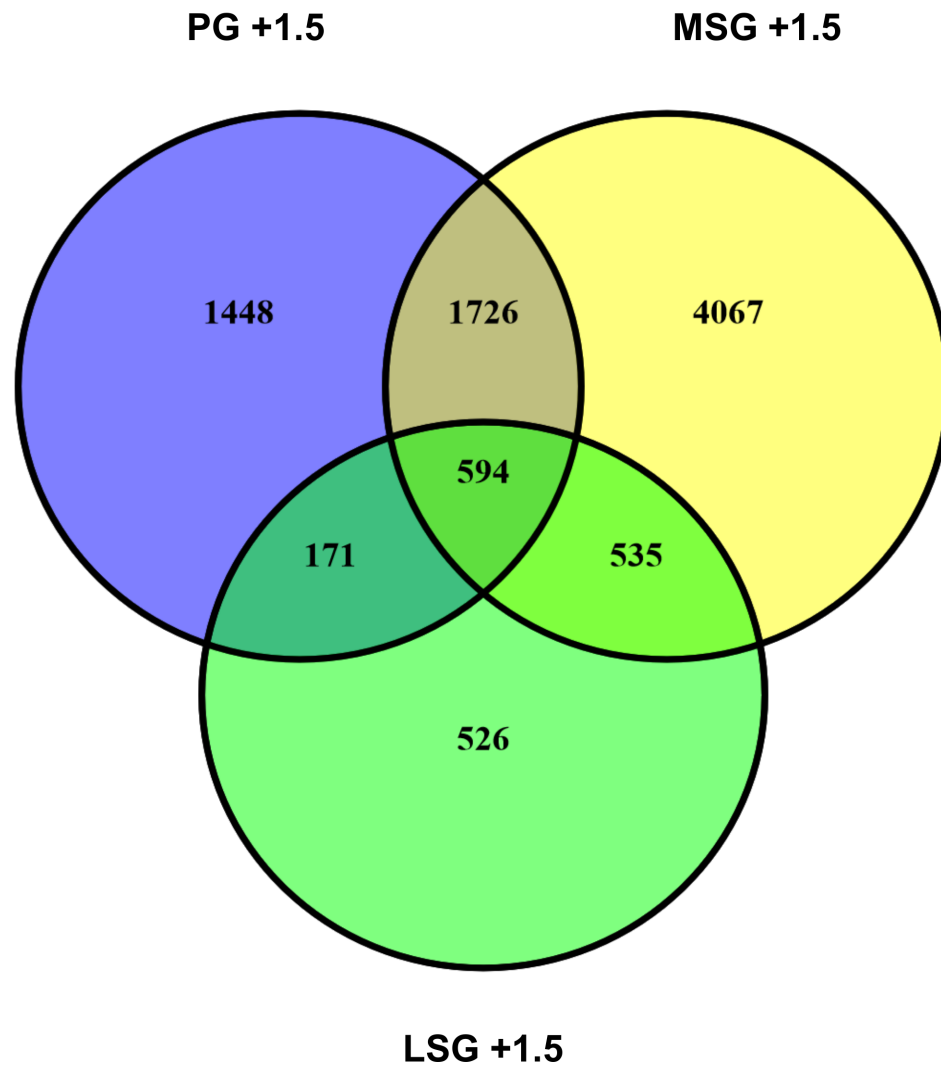

**Figure S2**

**S3**

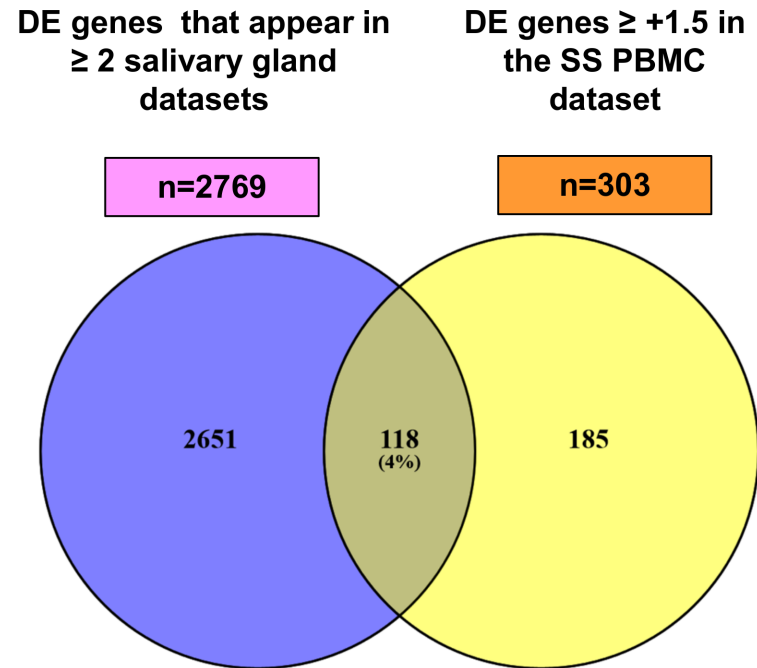

**Figure S3**

**S4**

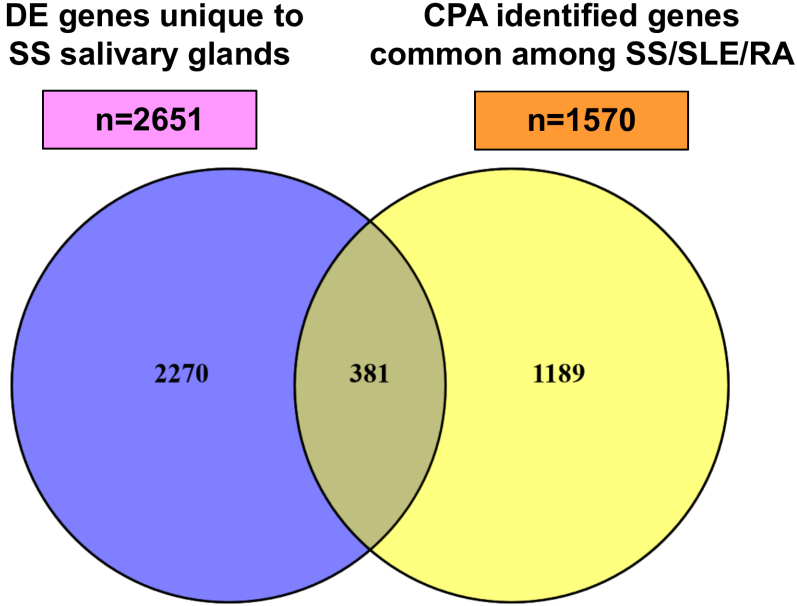

**Figure S4**
