# Supplementary material for: Biosemantics guided gene expression profiling of Sjögren’s syndrome: a comparative analysis with systemic lupus erythematosus and rheumatoid arthritis
Source: Springer Nature journal article supplement (doi:10.1186/s13075-017-1400-3), 2017-08-17
Supplement: MOESM8 [file 14222708]

- GWAS = 14
- Up-regulated in SS = 43
- Down-regulated in SS = 2
- Up-regulated in SS (candidate) = 14
- Down-regulated in SS (candidate) = 7

# Network 1

S5

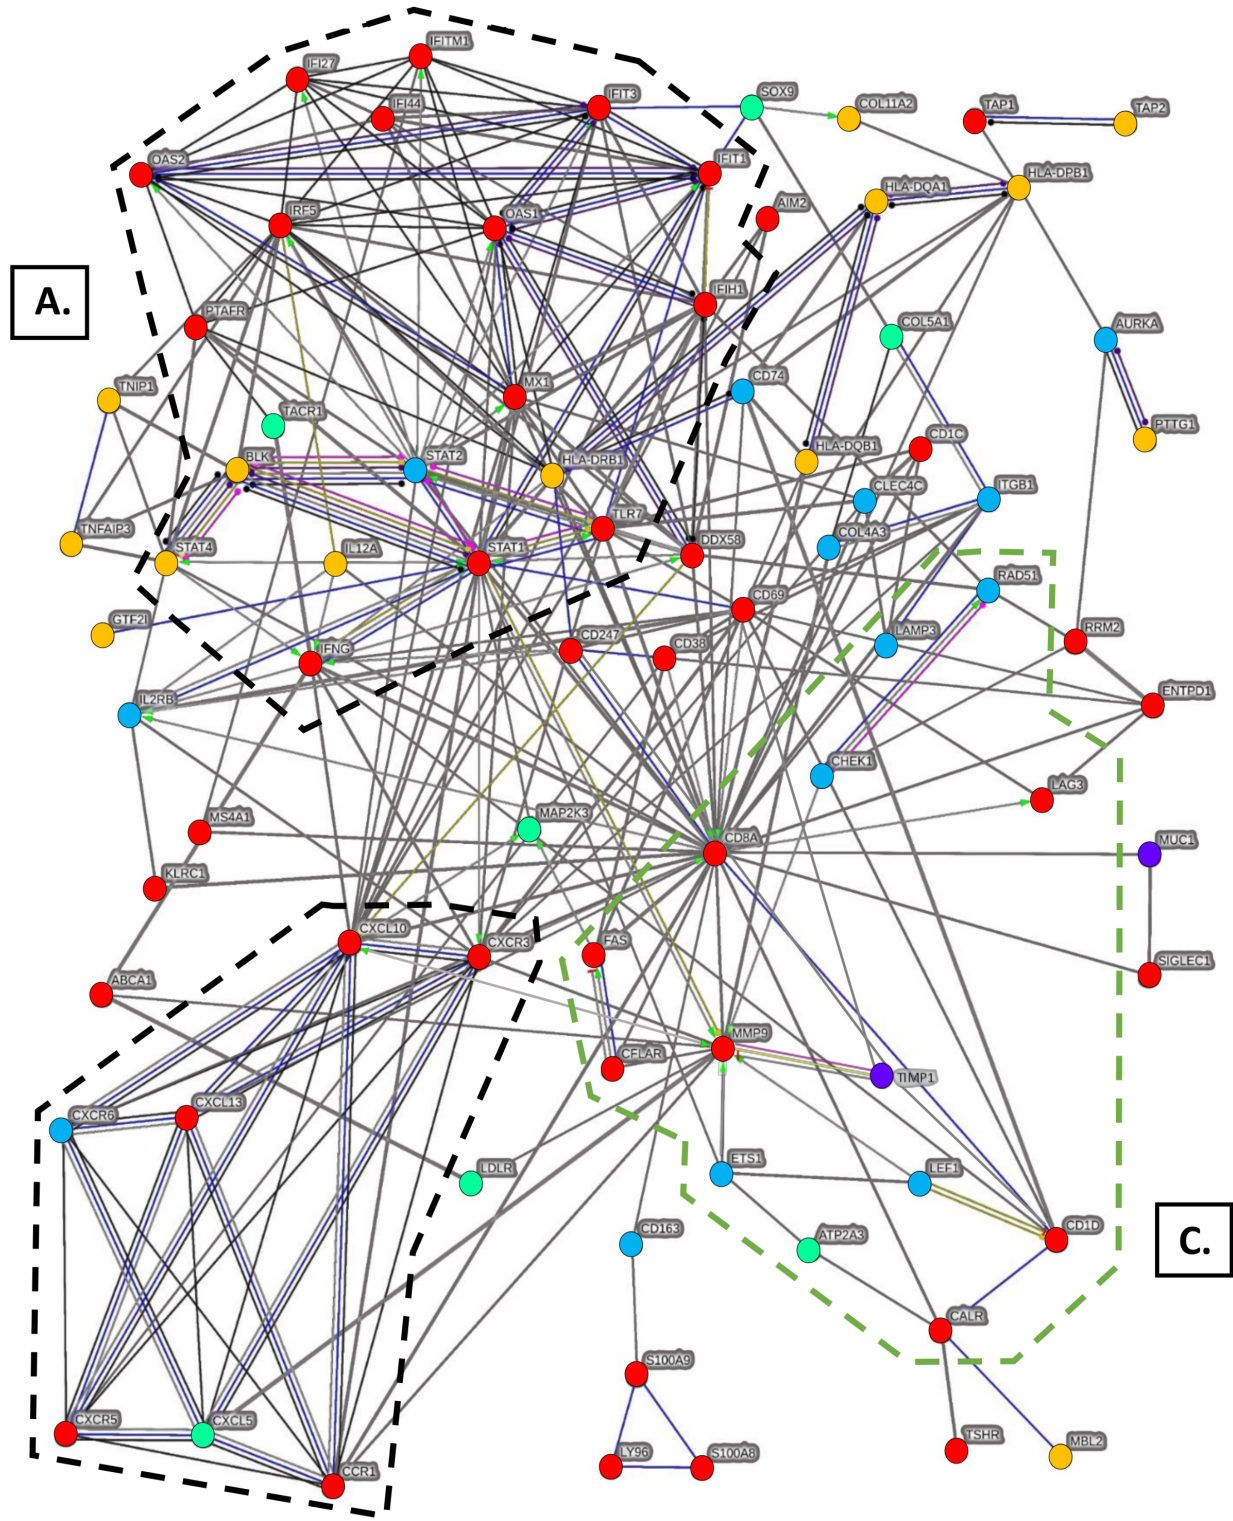

### Action Types

- → ● positive
- —| ● negative
- —○ ● unspecified

### Action Effects

- — ● activation
- — ● binding
- — ● phenotype
- — ● post-translational modification
- — ● inhibition
- — ● catalysis
- — ● reaction
- — ● transcriptional regulation
