# Supplementary material for: Biosemantics guided gene expression profiling of Sjögren’s syndrome: a comparative analysis with systemic lupus erythematosus and rheumatoid arthritis
Source: Springer Nature journal article supplement (doi:10.1186/s13075-017-1400-3), 2017-08-17
Supplement: MOESM9 [file 14222708]

● Up-regulated in SS = 134  
 ● Up-regulated in SS (candidate) = 7

**A.**

**C.**

**B.**

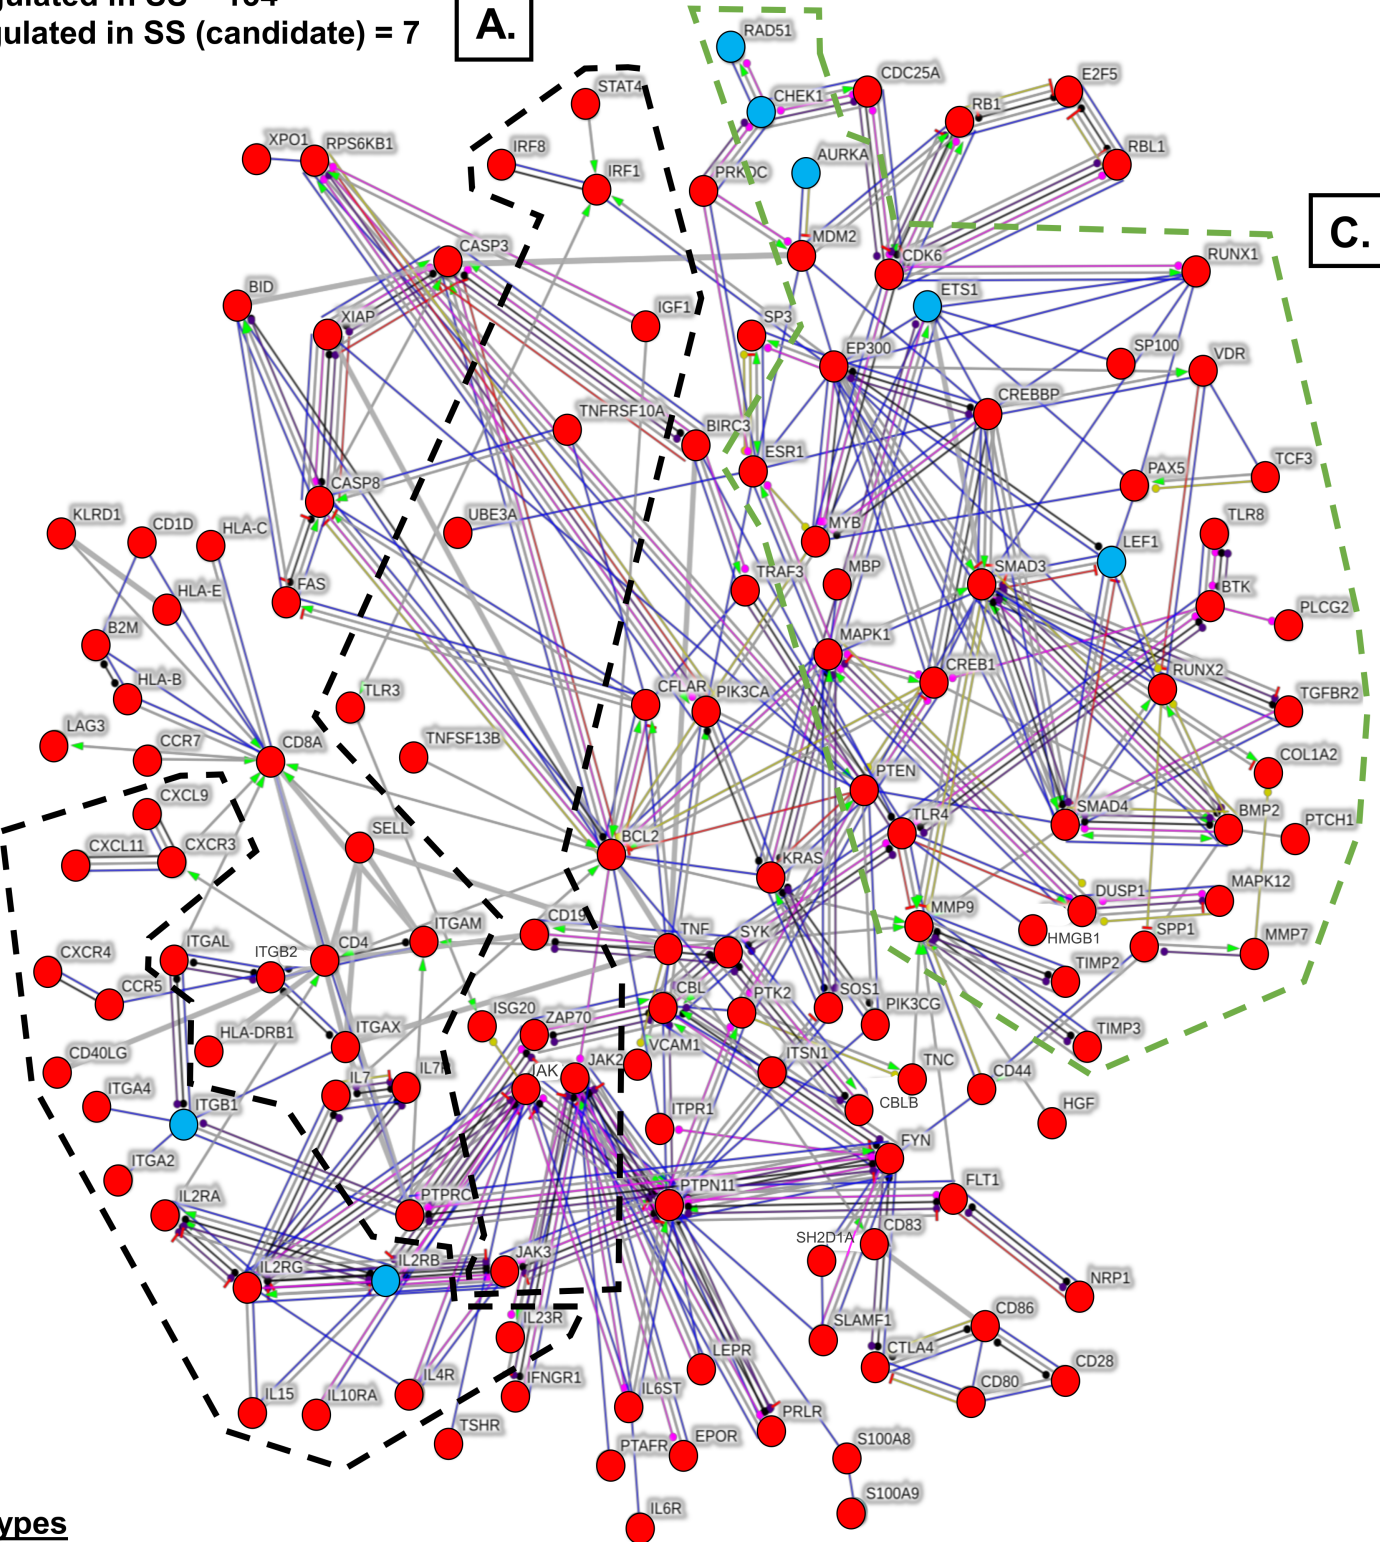

**Action Types**

- positive
- negative
- unspecified

**Action Effects**

- activation
- binding
- phenotype
- post-translational modification
- inhibition
- catalysis
- reaction
- transcriptional regulation
