# Supplementary material for: Biosemantics guided gene expression profiling of Sjögren’s syndrome: a comparative analysis with systemic lupus erythematosus and rheumatoid arthritis
Source: Springer Nature journal article supplement (doi:10.1186/s13075-017-1400-3), 2017-08-17
Supplement: MOESM10 [file 14222708]

# Composite Network

- Network 1 = 10
- Network 2 = 30
- Common = 5

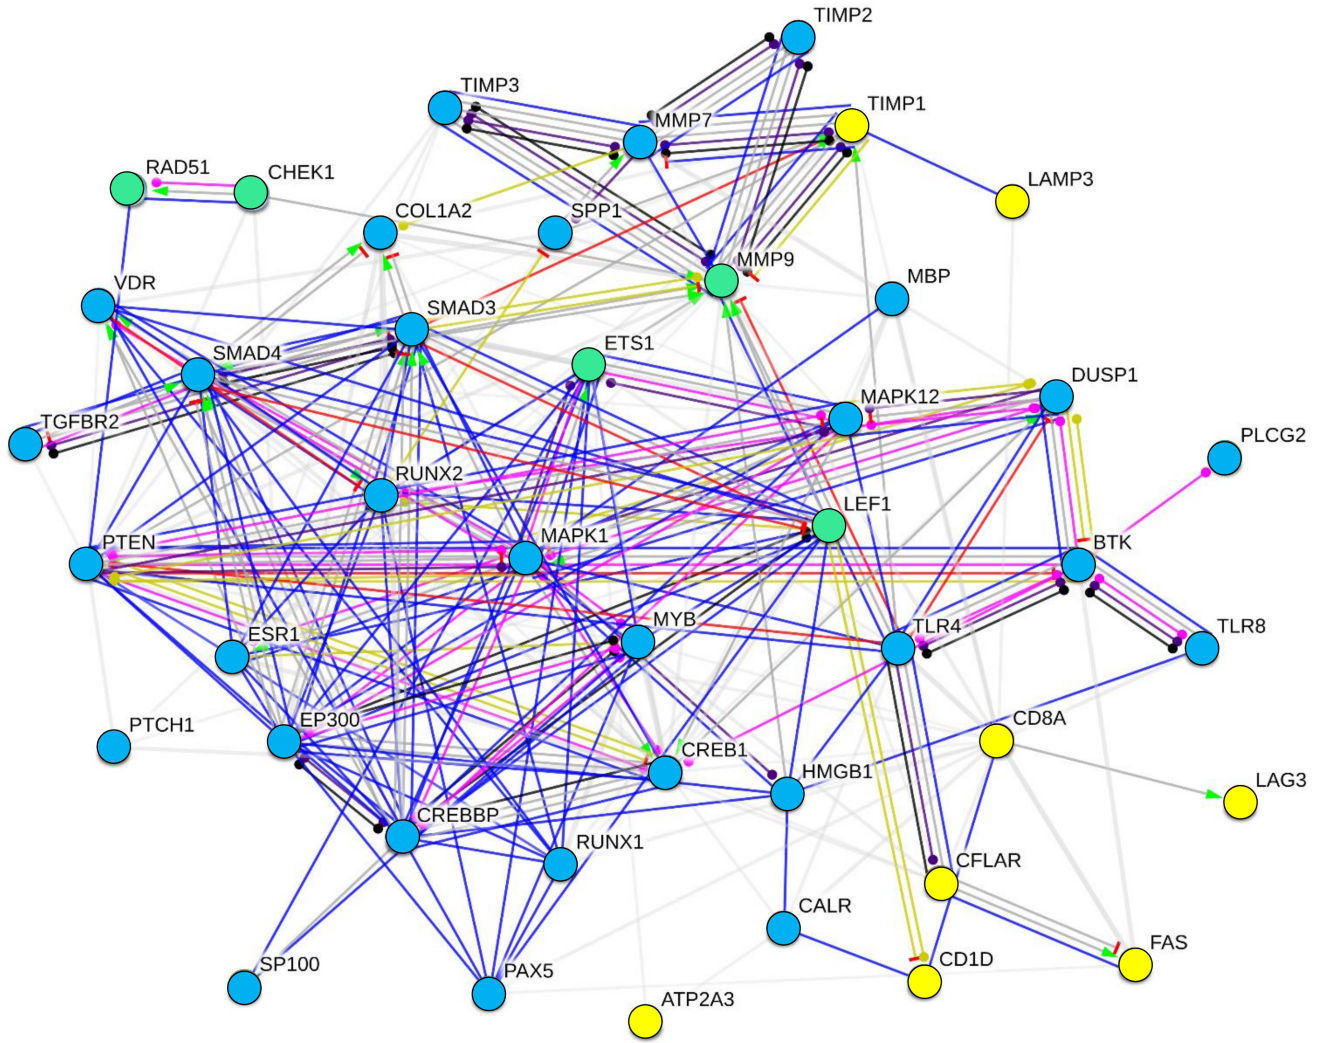

**Network 1**  
(Subnetwork C. Figure S5)
**+**
**Network 2**  
(Subnetwork C. Figure S6)

### Action Types

- → ● positive
- —| ● negative
- - ● unspecified

### Action Effects

- |                                                                                                                 |                                                                                                          |
|-----------------------------------------------------------------------------------------------------------------|----------------------------------------------------------------------------------------------------------|
| <span style="color: green;">●</span> — <span style="color: green;">●</span> activation                          | <span style="color: red;">●</span> — <span style="color: red;">●</span> inhibition                       |
| <span style="color: blue;">●</span> — <span style="color: blue;">●</span> binding                               | <span style="color: purple;">●</span> — <span style="color: purple;">●</span> catalysis                  |
| <span style="color: cyan;">●</span> — <span style="color: cyan;">●</span> phenotype                             | <span style="color: black;">●</span> — <span style="color: black;">●</span> reaction                     |
| <span style="color: magenta;">●</span> — <span style="color: magenta;">●</span> post-translational modification | <span style="color: yellow;">●</span> — <span style="color: yellow;">●</span> transcriptional regulation |
